# Supplementary material for: Gene-Environment Interaction in the Onset of Eczema in Infancy: Filaggrin Loss-of-Function Mutations Enhanced by Neonatal Cat Exposure
Source: PLOS journal article supplement (doi:10.1371/journal.pmed.0050131), 2008-06-19
Supplement: S3 (10.1371/journal.pmed.0050131.s003) [file journal.pmed.0050131.s003]

**ABSTRACT**

*Background:* Loss-of-function variants in the gene encoding filaggrin (*FLG*) are major

determinants of eczema. We hypothesized that weakening of the physical barrier in *FLG* deficient individuals may potentiate the effect of environmental exposures. Therefore, we investigated whether there is an interaction between *FLG* loss-of-function mutations with environmental exposures (pets and dust mites) in relation to the development of eczema.

*Methodology:* We used data obtained in early life in a high-risk birth cohort in Denmark and replicated the findings in an unselected birth cohort in UK. Primary outcome was age of onset of eczema; environmental exposures included pet ownership and mite and pet allergen levels.

*Principal Findings:* In Copenhagen (n=379), *FLG* mutation increased the risk of eczema

during the first year of life (HR 2.26, 95% CI 1.27-4.00, p=0.005), with a further increase in risk related to cat exposure at birth amongst children with *FLG* mutation (HR 11.11, 95% CI 3.79-32.60, p<0.0001); dog exposure was moderately protective (HR 0.49, 95% CI 0.24-1.01, p=0.05), but not related to *FLG* genotype. In Manchester (n=503) an independent and significant association of the development of eczema by age 12 months with *FLG* genotype was confirmed (HR 1.95, 95% CI 1.13-3.36, p=0.02). In addition, the risk increased due to the interaction of cat ownership at birth and *FLG* genotype (HR 3.82, 95% CI 1.35-10.81, p=0.01), with no significant effect of the interaction with dog ownership (HR 0.59, 95% CI 0.16-2.20, p=0.43). Mite-allergen had no effects in either cohort. The observed effects were independent of sensitization.

*Conclusions*: *FLG-*deficient individuals may need to avoid cats but not dogs in early life.

**Zusammenfassung**

Hintergrund: Nicht funktionierende Varianten des Gens, welches Filaggrin (FLG) kodiert, sind Hauptfaktoren des Ekzems. Unsere Hypothese lautete, dass auf Individuen ohne FLG der Einfluss von Umweltfaktoren stärker ist, da die körperliche Abwehr ihrer Haut geschwächt ist. Folglich untersuchten wir ob es einen Zusammenhang gibt zwischen nicht funktionierenden FLG Mutationen und Umweltfaktoren (Haustiere und Hausstaubmilben) in Bezug auf die Entwicklung von Ekzemen.

Methodik: Wir benutzten Daten, die in der frühen Kindheit in einer Geburtskohorte mit hohem Allergierisiko in Dänemark gesammelt worden waren. Wir reproduzierten unsere Ergebnisse mit Daten von einer gemischten Geburtskohorte in Großbritannien. Das Hauptziel unserer Analyse war das Alter in dem das Ekzem zuerst auftrat. Als Umweltfaktoren untersuchten wir den Besitz von Haustieren, und die Höhe der Hausstaubmilben - und Haustierallergene.

Hauptergebnisse: FLG Mutationen erhöhten das Risiko eines Ekzems währen des ersten Lebensjahres (HR 2.26, 95% CI 1.27-4.00, p=0.005) in der Geburtskohorte in Kopenhagen (n=379). Dieses Risiko erhöhte sich weiter in Kindern mit einer FLG Mutation und einer Katze im Besitz (HR 11.11, 95% CI 3.79-32.60, p<0.0001). Der Besitz von Hunden zeigte einen mäßigen Schutz vor Ekzemen (HR 0.49, 95% CI 0.24-1.01, p=0.05), aber es bestand kein Zusammenhang zum FLG Genotyp. Die Geburtskohorte in Manchester (n=503) bestätigte eine unabhängige und bedeutende Verbindung zwischen Ekzemen während der ersten zwölf Monate und dem FLG Genotyp (HR 1.95, 95% CI 1.13-3.36, p=0.02). Zusätzlich fanden wir ein erhöhtes Risiko durch eine Interaktion zwischen dem Besitz einer Katze von Geburt an und dem FLG Genotyp (HR 3.82, 95% CI 1.35-10.81, p=0.01). Eine Interaktion mit dem Besitz eines Hundes hatte jedoch keinen bedeutenden Einfluss auf die Entwicklung eines Ekzems (HR 0.59, 95% CI 0.16-2.20, p=0.43). In keiner der Kohorten wurde ein Einfluss von Hausstaubmilbenallergenen gefunden. Die beobachteten Einflüsse waren unabhängig von einer Allergisierung.

Schlussfolgerung: Kinder ohne FLG sollten möglicherweise den Besitz von Katzen, aber nich Hunden, während der frühen Lebensjahre vermeiden.
